# Supplementary material for: QualComp: a new lossy compressor for quality scores based on rate distortion theory
Source: Springer Nature journal article supplement (doi:10.1186/1471-2105-14-187), 2013-06-08

## Additional File 1 - Choosing the rate R

To illustrate some of the trade-offs in choosing  $R$ , we present additional simulations in this document. The general trend we would like to highlight is that while higher rates usually lead to better performance (in terms of MSE, selectivity and sensitivity), most of the gains are already achieved with small rates (e.g.  $R = 0.20$ ), where the savings in disk space are most substantial.

**Table 1 - SNP calling on the *M. musculus* dataset (SRR032209) with and without compression**

A detailed analysis of SNP calling, as in Table 11, over a refined range of rate values.

| Two clusters   |       |       |      |      |                 |                 |           |
|----------------|-------|-------|------|------|-----------------|-----------------|-----------|
| R              | MSE   | T.P.  | F.P  | F.N. | Selectivity (%) | Sensitivity (%) | Size (MB) |
| 0              | 37.58 | 12086 | 1534 | 941  | 88.73           | 92.77           | 0.039     |
| 0.05           | 22.73 | 12561 | 1345 | 466  | 90.33           | 96.42           | 4.07      |
| 0.10           | 19.27 | 12596 | 1285 | 431  | 90.74           | 96.69           | 8.11      |
| 0.15           | 17.60 | 12620 | 1212 | 407  | 91.24           | 96.88           | 12.15     |
| 0.20           | 16.42 | 12644 | 1184 | 383  | 91.44           | 97.06           | 16.19     |
| 0.25           | 15.53 | 12648 | 1143 | 379  | 91.71           | 97.09           | 20.23     |
| 0.30           | 14.80 | 12668 | 1128 | 359  | 91.82           | 97.24           | 24.27     |
| 0.33           | 14.39 | 12655 | 1107 | 372  | 91.95           | 97.14           | 26.70     |
| 0.35           | 14.14 | 12663 | 1093 | 364  | 92.05           | 97.21           | 28.31     |
| 0.40           | 13.55 | 12646 | 1071 | 381  | 92.19           | 97.08           | 32.35     |
| 0.45           | 13.00 | 12634 | 1043 | 393  | 92.37           | 96.98           | 36.40     |
| 0.50           | 12.47 | 12657 | 1043 | 370  | 92.39           | 97.16           | 40.44     |
| 0.66           | 11.00 | 12669 | 985  | 358  | 92.78           | 97.25           | 53.36     |
| 1.00           | 8.59  | 12687 | 830  | 340  | 93.85           | 97.39           | 80.84     |
| 2.00           | 3.76  | 12751 | 606  | 276  | 95.46           | 97.88           | 161.64    |
| Three clusters |       |       |      |      |                 |                 |           |
| R              | MSE   | T.P.  | F.P  | F.N. | Selectivity (%) | Sensitivity (%) | Size (MB) |
| 0              | 27.49 | 12048 | 1219 | 979  | 90.81           | 92.48           | 0.050     |
| 0.05           | 19.37 | 12535 | 1217 | 492  | 91.15           | 96.22           | 4.09      |
| 0.10           | 17.10 | 12599 | 1160 | 428  | 91.56           | 96.71           | 8.13      |
| 0.15           | 15.83 | 12609 | 1134 | 418  | 91.74           | 96.79           | 12.17     |
| 0.20           | 14.89 | 12638 | 1108 | 389  | 91.93           | 97.01           | 16.21     |
| 0.25           | 14.16 | 12635 | 1092 | 392  | 92.04           | 96.99           | 20.25     |
| 0.30           | 13.50 | 12645 | 1087 | 382  | 92.08           | 97.06           | 24.30     |
| 0.33           | 13.09 | 12645 | 1070 | 382  | 92.19           | 97.06           | 26.98     |
| 0.35           | 12.90 | 12632 | 1054 | 395  | 92.50           | 96.96           | 28.33     |
| 0.40           | 12.35 | 12632 | 1027 | 395  | 92.48           | 96.96           | 32.37     |
| 0.45           | 11.82 | 12642 | 997  | 385  | 92.69           | 97.04           | 36.41     |
| 0.50           | 11.33 | 12628 | 983  | 399  | 92.77           | 96.93           | 40.45     |
| 0.66           | 9.82  | 12646 | 909  | 381  | 93.29           | 97.07           | 53.91     |
| 1.00           | 7.35  | 12685 | 776  | 342  | 94.23           | 97.37           | 80.85     |
| 2.00           | 3.12  | 12730 | 554  | 297  | 95.83           | 97.72           | 161.65    |

**Table 2 - SNP calling on the H. sapiens dataset (SRR089526) with and without compression**

A detailed analysis of SNP calling, as in Table 12, over a refined range of rate values.

| Two clusters   |       |       |      |      |                 |                 |           |
|----------------|-------|-------|------|------|-----------------|-----------------|-----------|
| R              | MSE   | T.P.  | F.P  | F.N. | Selectivity (%) | Sensitivity (%) | Size (MB) |
| 0              | 25.21 | 51007 | 5010 | 9420 | 91.05           | 84.41           | 0.054     |
| 0.05           | 13.55 | 58195 | 5292 | 2232 | 91.66           | 96.30           | 6.88      |
| 0.10           | 11.45 | 58674 | 5321 | 1753 | 91.68           | 97.09           | 13.72     |
| 0.15           | 10.09 | 58865 | 5050 | 1562 | 92.09           | 97.41           | 20.56     |
| 0.20           | 9.09  | 58955 | 4949 | 1472 | 92.25           | 97.56           | 27.39     |
| 0.25           | 8.53  | 59002 | 4951 | 1425 | 92.25           | 97.64           | 34.23     |
| 0.30           | 8.13  | 59048 | 4942 | 1379 | 92.27           | 97.71           | 41.06     |
| 0.35           | 7.84  | 59090 | 4894 | 1337 | 92.35           | 97.78           | 47.90     |
| 0.40           | 7.60  | 59134 | 4874 | 1293 | 92.38           | 97.86           | 54.74     |
| 0.45           | 7.38  | 59129 | 4869 | 1298 | 92.39           | 97.85           | 61.57     |
| 0.50           | 7.17  | 59188 | 4784 | 1239 | 92.52           | 97.94           | 68.41     |
| 1.00           | 5.42  | 59400 | 4559 | 1027 | 92.87           | 98.30           | 136.76    |
| 2.00           | 3.02  | 59601 | 3718 | 826  | 94.12           | 98.63           | 273.48    |
| Three clusters |       |       |      |      |                 |                 |           |
| R              | MSE   | T.P.  | F.P  | F.N. | Selectivity (%) | Sensitivity (%) | Size (MB) |
| 0              | 17.32 | 52922 | 4686 | 7505 | 91.87           | 87.58           | 0.082     |
| 0.05           | 11.05 | 58451 | 4977 | 1976 | 92.15           | 96.73           | 6.91      |
| 0.10           | 9.57  | 58784 | 5111 | 1643 | 92.00           | 97.28           | 13.75     |
| 0.15           | 8.54  | 58839 | 4950 | 1588 | 92.24           | 97.37           | 20.58     |
| 0.20           | 7.80  | 58913 | 4823 | 1514 | 92.43           | 97.49           | 27.42     |
| 0.25           | 7.26  | 58977 | 4766 | 1450 | 92.52           | 97.60           | 34.26     |
| 0.30           | 6.89  | 58996 | 4661 | 1431 | 92.68           | 97.63           | 41.09     |
| 0.35           | 6.60  | 59031 | 4563 | 1396 | 92.82           | 97.69           | 47.93     |
| 0.40           | 6.35  | 59016 | 4497 | 1411 | 92.92           | 97.66           | 54.76     |
| 0.45           | 6.12  | 59065 | 4468 | 1362 | 92.97           | 97.75           | 61.60     |
| 0.50           | 5.90  | 59111 | 4411 | 1316 | 93.06           | 97.82           | 68.44     |
| 1.00           | 4.16  | 59247 | 4041 | 1180 | 93.61           | 98.05           | 136.79    |
| 2.00           | 1.99  | 59589 | 3262 | 838  | 94.81           | 98.61           | 273.51    |

**Table 3 - MSE and file sizes of QualComp when applied to the PhiX dataset**

MSE and file sizes obtained by our lossy compression algorithm for different rates ( $R$ ) and three clusters ( $C$ ) with the *PhiX* dataset.

| R    | C | MSE   | Size (MB) |
|------|---|-------|-----------|
| 0    | 3 | 18.62 | 0.28      |
| 0.05 | 3 | 11.73 | 8.21      |
| 0.10 | 3 | 10.36 | 16.15     |
| 0.15 | 3 | 9.45  | 24.08     |
| 0.20 | 3 | 8.75  | 32.41     |
| 0.25 | 3 | 8.13  | 39.95     |
| 0.30 | 3 | 7.58  | 47.88     |
| 0.35 | 3 | 7.10  | 55.82     |
| 0.40 | 3 | 6.67  | 63.75     |
| 0.45 | 3 | 6.29  | 71.68     |
| 0.50 | 3 | 5.94  | 81.18     |
| 1.00 | 3 | 3.63  | 159.98    |
| 2.00 | 3 | 1.62  | 318.58    |
| 2.50 | 3 | 1.12  | 398.38    |
| 3.00 | 3 | 0.89  | 476.31    |

**Table 4 - Comparison of file sizes and running times with different compression methods**

We apply SCALCE, Gzip and our lossy compression algorithm on the *PhiX*, *H. sapiens* (SRR089526) and *M. musculus* (SRR032209) datasets. For QualComp we report the results both without clustering ( $C = 1$ ) and with clustering ( $C = 3$ ). In both cases the rate  $R$  is set to 0.20.

|                              | PhiX      | SRR089526 | SRR032209 |
|------------------------------|-----------|-----------|-----------|
| Original file                | 1.3 GB    | 1.1 GB    | 665 MB    |
| Lossless Compression         |           |           |           |
| Gzip                         | 592.00 MB | 389.00 MB | 277.00 MB |
| Time Gzip                    | 2 min     | 1.5 min   | 1 min     |
| Scalce                       | 468.09 MB | 278.90 MB | 214.12 MB |
| Time Scalce                  | 8.5 min   | 5 min     | 2 min     |
| Lossy Compression (QualComp) |           |           |           |
| $C = 1$ and $R = 0.20$       | 32.09 MB  | 27.37 MB  | 16.17 MB  |
| Compression                  | 3.5 min   | 2 min     | 1 min     |
| Statistics                   | 22 min    | 9.5 min   | 4 min     |
| $C = 3$ and $R = 0.20$       | 32.41 MB  | 27.42 MB  | 16.21 MB  |
| Compression                  | 4 min     | 2 min     | 1 min     |
| Statistics                   | 25 min    | 10 min    | 4 min     |
| Clustering                   | 60 min    | 24 min    | 20 min    |

**Figure 1 - Selectivity and sensitivity of SNP calling as a function of the rate over the *H. sapiens* dataset (SRR089526)**

We assess the selectivity and sensitivity of SNP calling with Samtools on the *H. sapiens* dataset, compressed using QualComp with different rates and 2 clusters (a) and 3 clusters (b). Definitions of selectivity and sensitivity are as in Table 11. Red dashed lines represent the slope at different points of the

curve. Note that the most significant improvement is obtained in the range 0 – 0.2. Hence, we suggest setting the default value of  $R$  to 0.2.

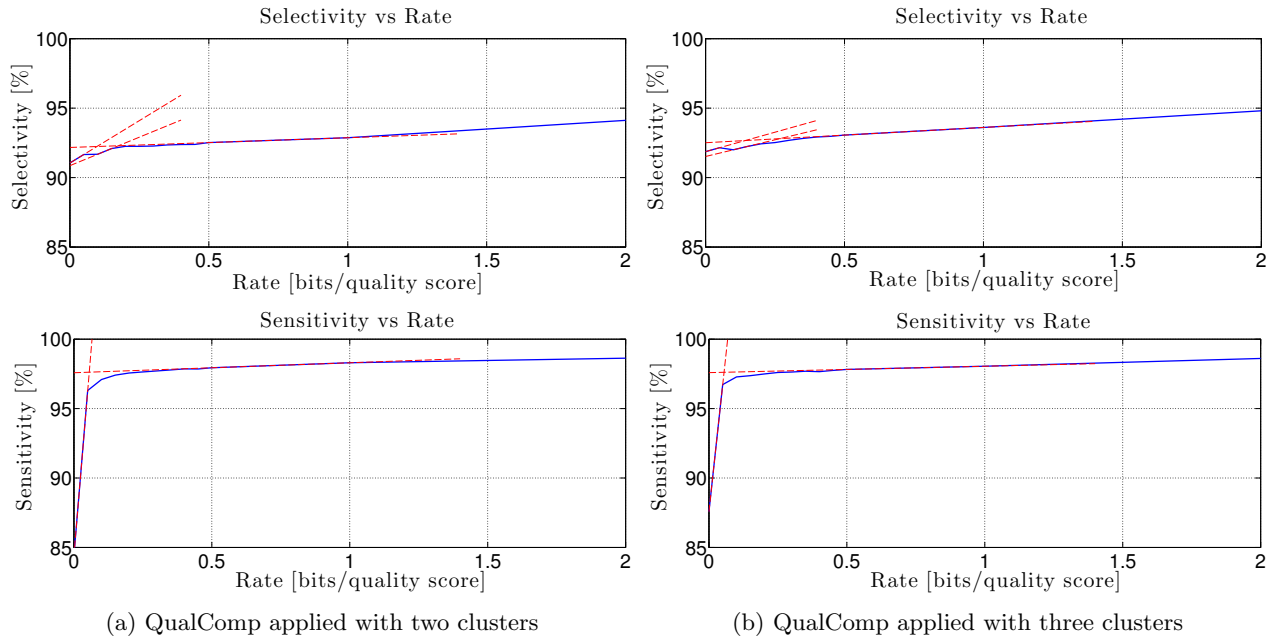

Supplement: 12859_2012_5956_MOESM1_ESM.pdf [file 12859_2012_5956_MOESM1_ESM.pdf]
