# Supplementary material for: QualComp: a new lossy compressor for quality scores based on rate distortion theory
Source: Springer Nature journal article supplement (doi:10.1186/1471-2105-14-187), 2013-06-08

*M. musculus* data (SRR032209)

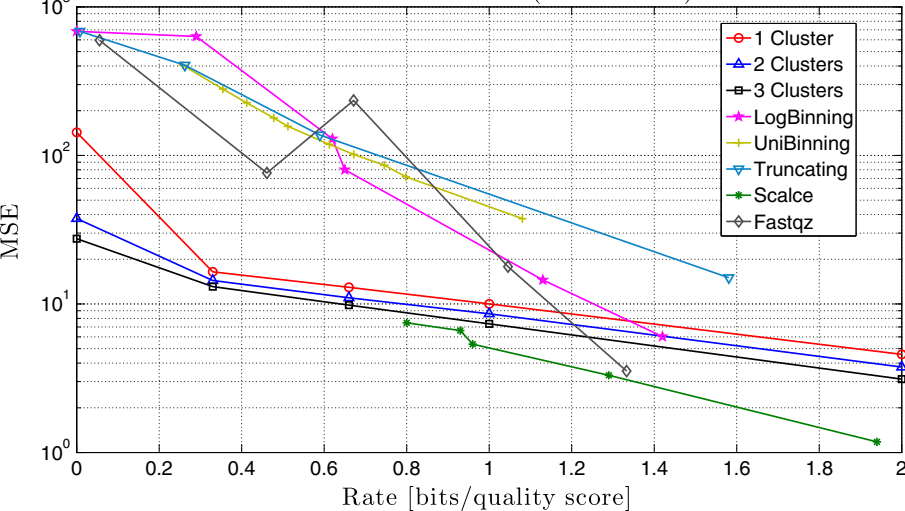

Supplement: 12859_2012_5956_MOESM4_ESM.pdf [file 12859_2012_5956_MOESM4_ESM.pdf]
